# Supplementary material
Source: publisher figshare collection journal article supplement (https://rs.figshare.com/ndownloader/files/23098214)
Supplement: Supplementary file [file 23098214]

**Table S1:** List and characteristics of the specimens selected for experiment #1 (incubation with  $^{15}\text{NH}_4$ ), experiment #2 (incubation with  $^{15}\text{NO}_3$ ), experiment #3 (feeding with  $^{13}\text{C}$ - $^{15}\text{N}$ -*Artemia*) and as controls for NanoSIMS analysis. Juvenile (j) refers to specimens fixed for TEM with only a trochospiral test, adult (a) refers to specimens fixed for TEM that had produced a spherical final chamber.

| Foram #    | Experiment | Incubation time | Food particle when sampled | Life stage (juvenile / adult) |                   | Remarks                                             |
|------------|------------|-----------------|----------------------------|-------------------------------|-------------------|-----------------------------------------------------|
|            |            |                 |                            | Beginning of the experiment   | End of experiment |                                                     |
| 126        | Control    | -               |                            | s                             | s                 |                                                     |
| 142        | Control    | -               |                            | j                             | j                 | <b>dead</b>                                         |
| 166        | Control    | -               |                            | s                             | s                 |                                                     |
| 124        | Exp. 1     | 1 h             |                            | j                             | j                 |                                                     |
| 144        | Exp. 1     | 1 h             |                            | j                             | j                 |                                                     |
| 167        | Exp. 1     | 1 h             | yes                        | s                             | s                 |                                                     |
| 130        | Exp. 1     | 6 h             | yes                        | s                             | s                 |                                                     |
| 137        | Exp. 1     | 6 h             |                            | s                             | s                 |                                                     |
| 157        | Exp. 1     | 6 h             |                            | j                             | j                 |                                                     |
| 127        | Exp. 1     | 12 h            |                            | s                             | s                 |                                                     |
| 131        | Exp. 1     | 12 h            |                            | s                             | s                 |                                                     |
| 155        | Exp. 1     | 12 h            |                            | s                             | s                 |                                                     |
| 123        | Exp. 1     | 18 h            |                            | s                             | s                 |                                                     |
| 145        | Exp. 1     | 18 h            |                            | j                             | j                 |                                                     |
| 158        | Exp. 1     | 18 h            | yes                        | j                             | j                 |                                                     |
| 122        | Exp. 2     | 1 h             |                            | s                             | s                 |                                                     |
| 146        | Exp. 2     | 1 h             |                            | j                             | j                 |                                                     |
| <b>163</b> | Exp. 2     | 1 h             | yes                        | s                             | s                 |                                                     |
| 128        | Exp. 2     | 6 h             | yes                        | s                             | s                 |                                                     |
| 134        | Exp. 2     | 6 h             |                            | s                             | s                 |                                                     |
| 168        | Exp. 2     | 6 h             | yes                        | j                             | j                 |                                                     |
| 125        | Exp. 2     | 12 h            |                            | s                             | s                 |                                                     |
| 129        | Exp. 2     | 12 h            | yes                        | j                             | j                 | <b>dead</b>                                         |
| 154        | Exp. 2     | 12 h            |                            | j                             | j                 |                                                     |
| 133        | Exp. 2     | 18 h            |                            | s                             | s                 |                                                     |
| 152        | Exp. 2     | 18 h            | yes                        | j                             | j                 |                                                     |
| 164        | Exp. 2     | 18 h            |                            | j                             | j                 |                                                     |
| 132        | Exp. 3     | 8 h             |                            | j                             | j                 | <b>dead</b>                                         |
| 153        | Exp. 3     | 8 h             |                            | j                             | j                 | After 3h: no food particle visible                  |
| 165        | Exp. 3     | 8 h             |                            | j                             | j                 | After 3h: food particle still attached to the foram |
